# Supplementary material for: The effect of temperature on childhood hand, foot and mouth disease in Guangdong Province, China, 2010–2013: a multicity study
Source: PubMed Central journal article supplement (PMC6852944; doi:10.1186/s12879-019-4594-y), 2019-11-12

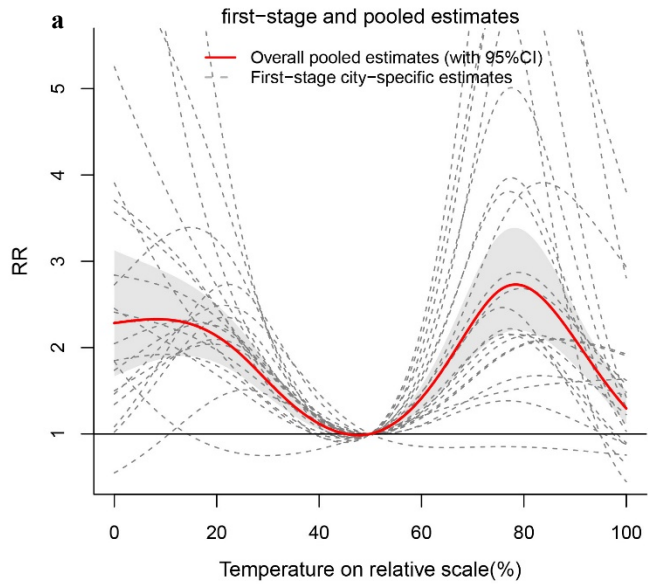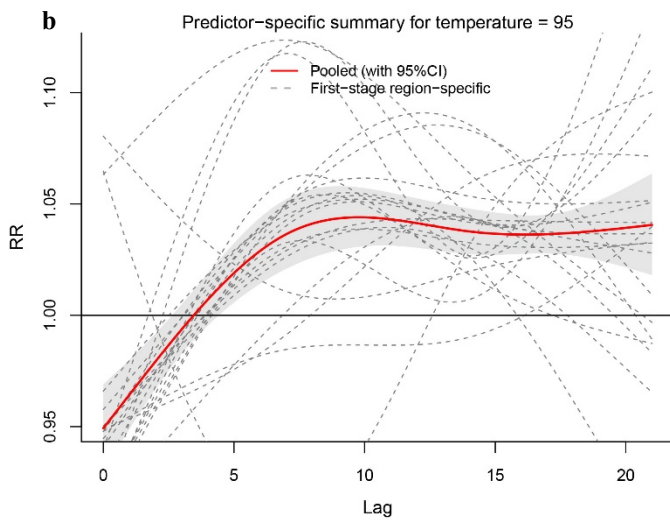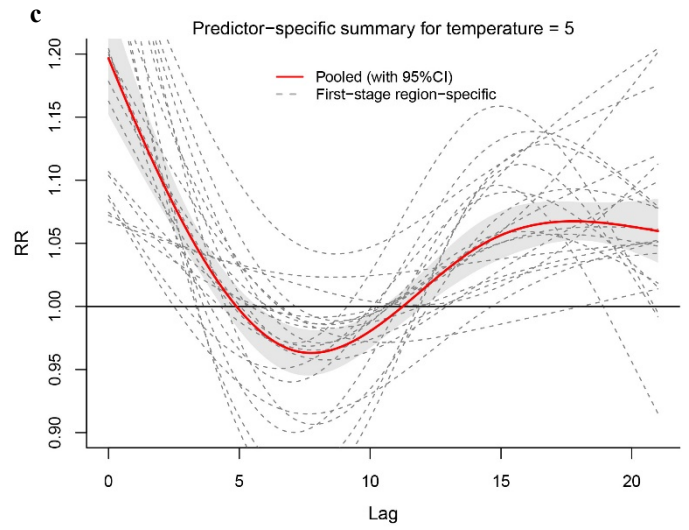

Supplement: 12879_2019_4594_MOESM3_ESM.pdf [file 12879_2019_4594_MOESM3_ESM.pdf]
